# Supplementary material for: Cyclohexene epoxidation with H2O2 in the vapor and liquid phases over a vanadium-based metal–organic framework
Source: Royal Society of Chemistry journal article supplement (doi:10.1039/d0cy00833h), 2020-01-01
Supplement: d0cy00833h1.pdf [file d0cy00833h1.pdf]

## Supplementary Material

# Cyclohexene Epoxidation with H<sub>2</sub>O<sub>2</sub> in the Vapor and Liquid Phases over a Vanadium-based Metal-Organic Framework

Tae-Ung Yoon<sup>a, +</sup>, Sol Ahn<sup>b, +</sup>, Ah-Reum Kim<sup>a</sup>, Justin M. Notestein<sup>b, \*</sup>, Omar K. Farha<sup>b, c, \*</sup>, and  
Youn-Sang Bae<sup>a, \*</sup>

<sup>a</sup> Department of Chemical and Biomolecular Engineering, Yonsei University, 50 Yonsei-ro,  
Seodaemun-gu, Seoul 03722, Korea

Tel.: 82-2-2123-2755; E-mail: [mowbae@yonsei.ac.kr](mailto:mowbae@yonsei.ac.kr)

<sup>b</sup> Department of Chemical and Biological Engineering and <sup>c</sup> International Institute of  
Nanotechnology and Department of Chemistry, Northwestern University, 2145 Sheridan Road,  
Evanston, Illinois 60208, United States

<sup>+</sup> These authors contributed equally to this work.

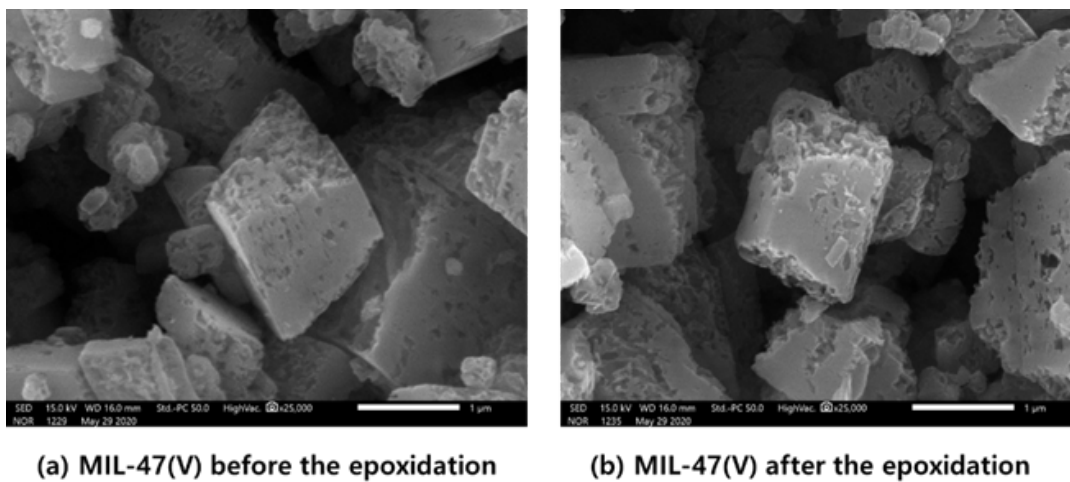

**Figure S1.** SEM images of MIL-47(V) (a) before and (b) after liquid-phase cyclohexene epoxidation at 65 °C.

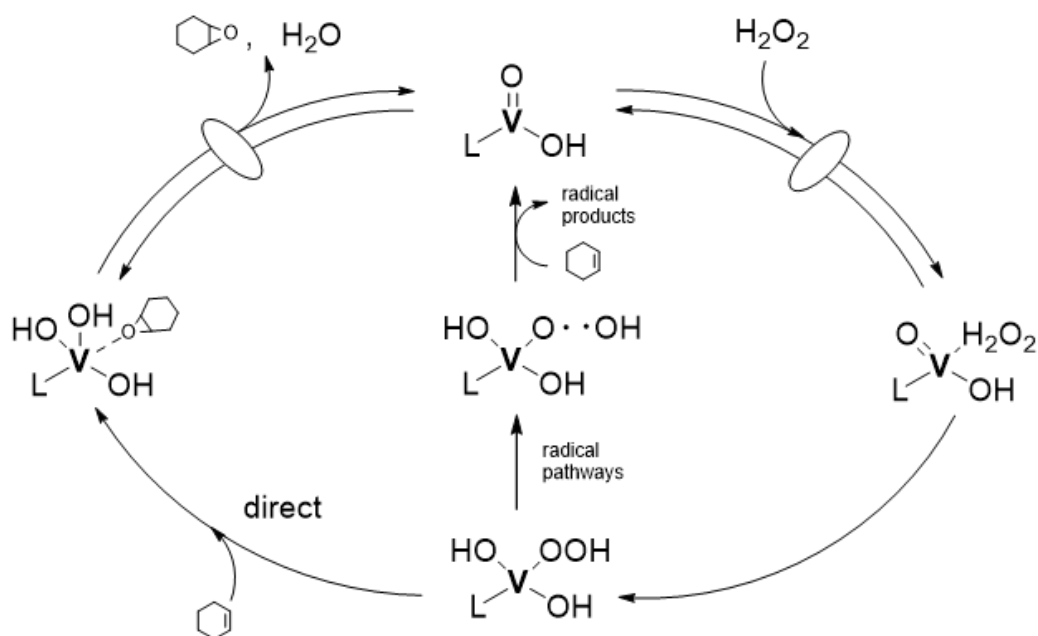

**Figure S2.** Proposed reaction networks of cyclohexene epoxidation with  $\text{H}_2\text{O}_2$  over MIL-47(V).

The role of the vanadium node in MIL-47(V) as an active site is proposed.  $\text{H}_2\text{O}_2$  is first bound to the node, and then forms OOH species. This species can undergo either direct or radical pathways via heterolytic or homolytic cleavage of OOH, respectively. In the former case, cyclohexene is bound to yield epoxide. In the case of radical pathway, cyclohexene reacts with radical and forms cyclohexenyl hydroperoxide, and then yield radical products.
